# Supplementary material for: Homology Modeling and Molecular Dynamics-Driven Search for Natural Inhibitors That Universally Target Receptor-Binding Domain of Spike Glycoprotein in SARS-CoV-2 Variants
Source: MDPI journal article supplement (doi:10.3390/molecules27217336), 2022-10-28
Supplement: s1 [file s1]

## Supporting information

# Homology Modelling and Molecular Dynamics-Driven Search for Natural Inhibitors That Universally Target Receptor-Binding Domain of Spike Glycoprotein in SARS-Cov-2 Variants

Olha Ovchynnykova <sup>1</sup>, Karina Kapusta <sup>2,\*</sup>, Natalia Sizochenko <sup>3</sup>, Kostyantyn M. Sukhyi <sup>1</sup>, Wojciech Kolodziejczyk <sup>4</sup>, Glake A. Hill <sup>4</sup>, and Julia Saloni <sup>4</sup>

<sup>1</sup> Ukrainian State University of Chemical Technology, Dnipro, 49005, Ukraine;

<sup>2</sup> Tougaloo College, Department of Chemistry and Physics, Tougaloo, MS, 39174, USA;

<sup>3</sup> The Ronin Institute for Independent Scholarship, Montclair, NJ, 07043, USA;

<sup>4</sup> Interdisciplinary Center for Nanotoxicity, Department of Chemistry, Physics and Atmospheric Sciences, Jackson State University, Jackson, MS, 39217, USA

\* Correspondence: karina.kapusta@icnanotox.org

**Table S1.** Ligands' SMILES codes.

| #  | Compound                      | IUPAC Name                                                                                                                                                                   | Canonical SMILES                                                                   |
|----|-------------------------------|------------------------------------------------------------------------------------------------------------------------------------------------------------------------------|------------------------------------------------------------------------------------|
| 1  | (-)-taxifolin                 | (2S,3S)-2-(3,4-dihydroxyphenyl)-3,5,7-trihydroxy-2,3-dihydrochromen-4-one                                                                                                    | <chem>C1=CC(=C(C=C1C2C(C(=O)C3=C(C=C(C=C3O2)O)O)O)O)O</chem>                       |
| 2  | (+)-Epicatechin               | (2S,3S)-2-(3,4-dihydroxyphenyl)-3,4-dihydro-2H-chromene-3,5,7-triol                                                                                                          | <chem>C1C(C(OC2=CC(=CC(=C21)O)O)C3=CC(=C(C=C3)O)O)O</chem>                         |
| 3  | (2S)-dihydrobaicalein         | (2S)-5,6,7-trihydroxy-2-phenyl-2,3-dihydrochromen-4-one                                                                                                                      | <chem>C1C(OC2=C(C1=O)C(=C(C(=C2)O)O)O)C3=CC=CC=C3</chem>                           |
| 4  | 3-O-Methylviolanolone         | (3S)-7-hydroxy-3-(2,3,4-trimethoxyphenyl)-2,3-dihydrochromen-4-one                                                                                                           | <chem>COC1=C(C(=C(C=C1)C2COC3=C(C2=O)C=CC(=C3)O)OC)O</chem>                        |
| 5  | 7-Methoxy-2-methyl isoflavone | 7-methoxy-2-methyl-3-phenylchromen-4-one                                                                                                                                     | <chem>CC1=C(C(=O)C2=C(O1)C=C(C(=C2)OC)C3=CC=CC=C3</chem>                           |
| 6  | Amygdalin                     | (2R)-2-phenyl-2-[(2R,3R,4S,5S,6R)-3,4,5-trihydroxy-6-[(2R,3R,4S,5S,6R)-3,4,5-trihydroxy-6-(hydroxymethyl)oxan-2-yl]oxymethyl]oxan-2-yl]oxyacetone nitrile                    | <chem>C1=CC=C(C=C1)C(C#N)OC2C(C(C(C(O2)COC3C(C(C(C(O3)CO)O)O)O)O)O)O</chem>        |
| 7  | arenobufagin                  | 5-[(3S,5R,8R,9S,10S,11S,13R,14S,17R)-3,11,14-trihydroxy-10,13-dimethyl-12-oxo-2,3,4,5,6,7,8,9,11,15,16,17-dodecahydro-1H-cyclopenta[a]phenanthren-17-yl]pyran-2-one          | <chem>CC12CCC(CC1CCC3C2C(C(=O)C4(C3(CCC4C5=COC(=O)C=C5)O)C)O)O</chem>              |
| 8  | Astragalus polysaccharide     | 2-(chloromethyl)-4-(4-nitrophenyl)-1,3-thiazole                                                                                                                              | <chem>C1=CC(=CC(=C1C2=C(CSC(=N2)CC1)[N+](=O)[O-])</chem>                           |
| 9  | Baicalin                      | (2S,3S,4S,5R,6S)-6-(5,6-dihydroxy-4-oxo-2-phenylchromen-7-yl)oxy-3,4,5-trihydroxyoxane-2-carboxylic acid                                                                     | <chem>C1=CC=C(C=C1)C2=CC(=O)C3=C(C(=C(C=C3O2)OC4C(C(C(C(O4)C(=O)O)O)O)O)O)O</chem> |
| 10 | bufotalin                     | [(3S,5R,8R,9S,10S,13R,14S,16S,17R)-3,14-dihydroxy-10,13-dimethyl-17-(6-oxopyran-3-yl)-1,2,3,4,5,6,7,8,9,11,12,15,16,17-tetradecahydrocyclopenta[a]phenanthren-16-yl] acetate | <chem>CC(=O)OC1CC2(C3CCC4CC(CCC4(C3CCCC2(C1C5=COC(=O)C=C5)C)C)O)O</chem>           |
| 11 | Cianidanol                    | (2R,3S)-2-(3,4-dihydroxyphenyl)-3,4-dihydro-2H-chromene-3,5,7-triol                                                                                                          | <chem>C1C(C(OC2=CC(=CC(=C21)O)O)C3=CC(=C(C=C3)O)O)O</chem>                         |
| 12 | cinobufotalin                 | [(1R,2S,4R,5R,6R,7R,10S,11R,14S,16S)-14,16-dihydroxy-7,11-dimethyl-6-(6-oxopyran-3-yl)-3-oxapentacyclo[8.8.0.0.2.4.0.2.7.0.11.16]octadecan-5-yl] acetate                     | <chem>CC(=O)OC1C(C2(CCC3C(C24C1O4)CCC5(C3(CCC(C5)O)C)O)C)C6=COC(=O)C=C6</chem>     |
| 13 | cyclo(L-Tyr-l-Phe)            | (3S,6S)-3-benzyl-6-[(4-hydroxyphenyl)methyl]piperazine-2,5-dione                                                                                                             | <chem>C1=CC=C(C=C1)CC2C(=O)NC(C(=O)N2)CC3=CC=C(C=C3)O</chem>                       |
| 14 | Dammaradienyl acetate         | [(3S,8R,9R,10R,13R,14S,17S)-4,4,8,10,14-pentamethyl-17-(6-methylhepta-1,5-dien-2-yl)-2,3,5,6,7,9,11,12,13,15,16,17-dodecahydro-1H-cyclopenta[a]phenanthren-3-yl] acetate     | <chem>CC(=CCCC(=C)C1CCC2(C1CCC3C2(CCC4C3(CCC(C4(C)C)OC(=O)C)C)C)C</chem>           |
| 15 | Delphinidin                   | 2-(3,4,5-trihydroxyphenyl)chromenyl-3,5,7-triol;chloride                                                                                                                     | <chem>C1=C(C=C(C(=C1O)O)O)C2=[O+]C3=CC(=CC(=C3C2O)O)O.[Cl-]</chem>                 |
| 16 | desacetylcinobufotalin        | 5-[(1R,2S,4R,5R,6R,7R,10S,11R,14S,16S)-5,14,16-trihydroxy-7,11-dimethyl-3-oxapentacyclo[8.8.0.0.2.4.0.2.7.0.11.16]octadecan-6-yl]pyran-2-one                                 | <chem>CC12CCC(CC1(CCC3C2CCC4(C35C(O5)C(C4C6=COC(=O)C=C6)O)C)O)O</chem>             |
| 17 | Ephedrine                     | (1R,2S)-2-(methylamino)-1-phenylpropan-1-ol                                                                                                                                  | <chem>CC(C(C1=CC=CC=C1)O)NC</chem>                                                 |

|    |                         |                                                                                                                                                                                                                                                                                |                                                                                                                                 |
|----|-------------------------|--------------------------------------------------------------------------------------------------------------------------------------------------------------------------------------------------------------------------------------------------------------------------------|---------------------------------------------------------------------------------------------------------------------------------|
| 18 | Eriodyctiol (flavanone) | (2R)-2-(3,4-dihydroxyphenyl)-5,7-dihydroxy-2,3-dihydrochromen-4-one                                                                                                                                                                                                            | <chem>C1C(OC2=CC(=CC(=C2C1=O)O)O)C3=CC(=C(C=C3)O)O</chem>                                                                       |
| 19 | Estrone                 | (8R,9S,13S,14S)-3-hydroxy-13-methyl-7,8,9,11,12,14,15,16-octahydro-6H-cyclopenta[a]phenanthren-17-one                                                                                                                                                                          | <chem>CC12CCC3C(C1CCC2=O)CCC4=C3C=CC(=C4)O</chem>                                                                               |
| 20 | Fisetin                 | 2-(3,4-dihydroxyphenyl)-3,7-dihydroxychromen-4-one                                                                                                                                                                                                                             | <chem>C1=CC(=C(C=C1C2=C(C(=O)C3=C(C(2)C=C(C=C3)O)O)O)O)C(=O)O</chem>                                                            |
| 21 | Formononetin            | 7-hydroxy-3-(4-methoxyphenyl)chromen-4-one                                                                                                                                                                                                                                     | <chem>COC1=CC=C(C=C1)C2=COC3=C(C2=O)C=CC(=C3)O</chem>                                                                           |
| 22 | Gamabufotalin           | 5-[(3S,5R,8R,9S,10S,11R,13R,14S,17R)-3,11,14-trihydroxy-10,13-dimethyl-1,2,3,4,5,6,7,8,9,11,12,15,16,17-tetradecahydrocyclopenta[a]phenanthren-17-yl]pyran-2-one                                                                                                               | <chem>CC12CCCC(C1CCC3C2C(C(C4(C3(CCC4C5=COC(=O)C=C5)O)C)O)O</chem>                                                              |
| 23 | Glyasperin F            | 5,7-dihydroxy-3-(5-hydroxy-2,2-dimethylchromen-8-yl)-2,3-dihydrochromen-4-one                                                                                                                                                                                                  | <chem>CC1(C=CC2=C(C=CC(=C2O1)C3COC4=CC(=CC(=C4C3=O)O)O)C</chem>                                                                 |
| 24 | Glycyrrhetic Acid       | (2S,4aS,6aR,6aS,6bR,8aR,10S,12aS,14bR)-10-hydroxy-2,4a,6a,6b,9,9,12a-heptamethyl-13-oxo-3,4,5,6,6a,7,8,8a,10,11,12,14b-dodecahydro-1H-picene-2-carboxylic acid                                                                                                                 | <chem>CC1(C2CCC3(C(C2(CCC1O)C)C(=O)C=C4C3(CCC5(C4CC(C(C5)C)C(=O)O)C)C)C</chem>                                                  |
| 25 | Glycyrrhizic acid       | (2S,3S,4S,5R,6R)-6-[(2S,3R,4S,5S,6S)-2-[[[(3S,4aR,6aR,6bS,8aS,11S,12aR,14aR,14bS)-11-carboxy-4,4,6a,6b,8a,11,14b-heptamethyl-14-oxo-2,3,4a,5,6,7,8,9,10,12,12a,14a-dodecahydro-1H-picen-3-yl]oxy]-6-carboxy-4,5-dihydroxyoxan-3-yl]oxy-3,4,5-trihydroxyoxane-2-carboxylic acid | <chem>CC1(C2CCC3(C(C2(CCC1OC4C(C(C(C(O4)C(=O)O)O)O)OC5(C(C(C(C(O5)C(=O)O)O)O)C)C(=O)C=C6C3(CCC7(C6CC(C(C7)C)C(=O)O)C)C)C</chem> |
| 26 | Hederagenin             | (4aS,6aR,6aS,6bR,8aR,9R,10S,12aR,14bS)-10-hydroxy-9-(hydroxymethyl)-2,2,6a,6b,9,12a-hexamethyl-1,3,4,5,6,6a,7,8,8a,10,11,12,13,14b-tetradecahydronicene-4a-carboxylic acid                                                                                                     | <chem>CC1(CCC2(CCC3(C(=CCC4C3(CCC5C4(CCC(C5(C)CO)O)C)C)C2C1C)C(=O)O)C</chem>                                                    |
| 27 | Herbacetin              | 3,5,7,8-tetrahydroxy-2-(4-hydroxyphenyl)chromen-4-one                                                                                                                                                                                                                          | <chem>C1=CC(=CC(=C1C2=C(C(=O)C3=C(O2)C(=C(C=C3O)O)O)O)O</chem>                                                                  |
| 28 | Hesperidin              | (2S)-5-hydroxy-2-(3-hydroxy-4-methoxyphenyl)-7-[(2S,3R,4S,5S,6R)-3,4,5-trihydroxy-6-[[[(2R,3R,4R,5R,6S)-3,4,5-trihydroxy-6-methyloxan-2-yl]oxymethyl]oxan-2-yl]oxy-2,3-dihydrochromen-4-one                                                                                    | <chem>CC1C(C(C(C(O1)OCC2C(C(C(C(O2)OC3=CC(=C4C(=O)CC(OC4=C3)C5=CC(=C(C=C5)OC)O)O)O)O)O)O)O</chem>                               |
| 29 | Inflacoumarin A         | 7-hydroxy-4-(4-hydroxyphenyl)-6-(3-methylbut-2-enyl)chromen-2-one                                                                                                                                                                                                              | <chem>CC(=CCC1=CC2=C(C=C1O)OC(=O)C=C2C3=CC=C(C=C3)O)C</chem>                                                                    |
| 30 | Isolicoflavonol         | 3,5,7-trihydroxy-2-[4-hydroxy-3-(3-methylbut-2-enyl)phenyl]chromen-4-one                                                                                                                                                                                                       | <chem>CC(=CCC1=C(C=CC(=C1)C2=C(C(C(=O)C3=C(C=C(C=C3O2)O)O)O)C</chem>                                                            |
| 31 | Isotrifoliol            | 3,9-dihydroxy-1-methoxy-[1]benzofuro[3,2-c]chromen-6-one                                                                                                                                                                                                                       | <chem>COC1=CC(=CC2=C1C3=C(C4=C(O3)C=C(C(C4=O)C(=O)O2)O</chem>                                                                   |
| 32 | Kaempferol              | 3,5,7-trihydroxy-2-(4-hydroxyphenyl)chromen-4-one                                                                                                                                                                                                                              | <chem>C1=CC(=CC(=C1C2=C(C(=O)C3=C(C=C(C=C3O2)O)O)O)O</chem>                                                                     |
| 33 | Kanzonol F              | (1R,13R)-15-methoxy-7,7-dimethyl-16-(3-methylbut-2-enyl)-8,12,20-trioxapentacyclo[11.8.0.02,11.04,9,014,19]henicosane-2(11),3,5,9,14(19),15,17-heptaen-17-ol                                                                                                                   | <chem>CC(=CCC1=C(C2=C(C=C1O)OCC3C2OC4=C3C=C5C=CC(O(C5=C4)(C)C)OC)C</chem>                                                       |
| 34 | Licoisoflavone B        | 5,7-dihydroxy-3-(5-hydroxy-2,2-dimethylchromen-6-yl)chromen-4-one                                                                                                                                                                                                              | <chem>CC1(C=CC2=C(O1)C=CC(=C2O)C3=COC4=CC(=CC(=C4C3=O)O)O)C</chem>                                                              |
| 35 | Luteolin                | 2-(3,4-dihydroxyphenyl)-5,7-dihydroxychromen-4-one                                                                                                                                                                                                                             | <chem>C1=CC(=C(C=C1C2=CC(=O)C3=C(C=C(C=C3O2)O)O)O)O</chem>                                                                      |
| 36 | Mairin                  | (1R,3aS,5aR,5bR,7aR,9S,11aR,11bR,13aR,13bR)-9-hydroxy-5a,5b,8,8,11a-pentamethyl-1-prop-1-en-2-yl-1,2,3,4,5,6,7,7a,9,10,11,11b,12,13,13a,13b-hexadecahydrocyclopenta[a]chrysene-3a-carboxylic acid                                                                              | <chem>CC(=C)C1CCC2(C1C3CCCC4C5(CCC(C(C5CCCC4(C3(CC2)C)C)C)C)O)C(=O)O</chem>                                                     |
| 37 | naringenin              | 5,7-dihydroxy-2-(4-hydroxyphenyl)-2,3-dihydrochromen-4-one                                                                                                                                                                                                                     | <chem>C1C(OC2=CC(=CC(=C2C1=O)O)O)C3=CC=C(C=C3)O</chem>                                                                          |
| 38 | Narirutin               | (2S)-5-hydroxy-2-(4-hydroxyphenyl)-7-[(2S,3R,4S,5S,6R)-3,4,5-trihydroxy-6-[[[(2R,3R,4R,5R,6S)-3,4,5-trihydroxy-6-methyloxan-2-yl]oxymethyl]oxan-2-yl]oxy-2,3-dihydrochromen-4-one                                                                                              | <chem>CC1C(C(C(C(O1)OCC2C(C(C(C(O2)OC3=CC(=C4C(=O)CC(OC4=C3)C5=CC=C(C=C5)O)O)O)O)O)O)O)O</chem>                                 |
| 39 | Neohesperidin           | (2S)-7-[(2S,3R,4S,5S,6R)-4,5-dihydroxy-6-(hydroxymethyl)-3-[(2S,3R,4R,5R,6S)-3,4,5-trihydroxy-6-methyloxan-2-yl]oxyoxan-2-yl]oxy-5-hydroxy-2-(3-hydroxy-4-methoxyphenyl)-2,3-dihydrochromen-4-one                                                                              | <chem>CC1C(C(C(C(O1)OC2C(C(C(OC2OC3=CC(=C4C(=O)CC(OC4=C3)C5=CC(=C(C=C5)OC)O)O)C(O)O)O)O)O)O</chem>                              |
| 40 | Oxysanguinarine         | 24-methyl-5,7,18,20-tetraoxa-24-azahexacyclo[11.11.0.02,10.04.8.014,22.017,21]tetracosane-1(13),2,4(8),9,11,14(22),15,17(21)-octaen-23-one                                                                                                                                     | <chem>CN1C2=C(C=CC3=CC4=C(C=C32)OCOC4)C5=C(C1=O)C6=C(C=C5)OCOC6</chem>                                                          |
| 41 | Quercetin               | 2-(3,4-dihydroxyphenyl)-3,5,7-trihydroxychromen-4-one                                                                                                                                                                                                                          | <chem>C1=CC(=C(C=C1C2=C(C(=O)C3=C(C=C(C=C3O2)O)O)O)O)O</chem>                                                                   |
| 42 | Resivitt                | 2-(3,4-dihydroxyphenyl)-3,4-dihydro-2H-chromene-3,4,5,7-tetrol                                                                                                                                                                                                                 | <chem>C1=CC(=C(C=C1C2C(C(C3=C(C=C(C=C3O2)O)O)O)O)O)O</chem>                                                                     |
| 43 | Semilicoisoflavone-B    | 5,7-dihydroxy-3-(8-hydroxy-2,2-dimethylchromen-6-yl)chromen-4-one                                                                                                                                                                                                              | <chem>CC1(C=CC2=C(O1)C=CC(=C2)C3=COC4=CC(=CC(=C4C3=O)O)O)C</chem>                                                               |
| 44 | Sitosterol              | (3S,8S,9S,10R,13R,14S,17R)-17-[(2R,5R)-5-ethyl-6-methylheptan-2-yl]-10,13-dimethyl-2,3,4,7,8,9,11,12,14,15,16,17-dodecahydro-1H-cyclopenta[a]phenanthren-3-ol                                                                                                                  | <chem>CCC(CCC(C)C1CCC2C1(CCC3C2CC=C4C3(CCC(C4)O)C)C)C</chem>                                                                    |
| 45 | SR-01000767148          | (2R)-5,7-dihydroxy-2-(3-hydroxy-4-methoxyphenyl)-2,3-dihydrochromen-4-one                                                                                                                                                                                                      | <chem>COC1=C(C=C(C=C1)C2CC(=O)C3=C(C=C(C=C3O2)O)O)O</chem>                                                                      |
| 46 | Stigmasterol            | (3S,8S,9S,10R,13R,14S,17R)-17-[(E,2R,5S)-5-ethyl-6-methylhept-3-en-2-yl]-10,13-dimethyl-2,3,4,7,8,9,11,12,14,15,16,17-dodecahydro-1H-cyclopenta[a]phenanthren-3-ol                                                                                                             | <chem>CCC(C=CC(C)C1CCC2C1(CCC3C2CC=C4C3(CCC(C4)O)C)C)C</chem>                                                                   |
| 47 | telocinobufagin         | 5-[(3S,5S,8R,9S,10R,13R,14S,17R)-3,5,14-trihydroxy-10,13-dimethyl-2,3,4,6,7,8,9,11,12,15,16,17-dodecahydro-1H-cyclopenta[a]phenanthren-17-yl]pyran-2-one                                                                                                                       | <chem>CC12CCC(C1(CCC3C2CCCC4(C3(CCC4C5=COC(=O)C=C5)O)C)O)O</chem>                                                               |
| 48 | ZINC13130930            | (2R)-5,7-dihydroxy-6-methoxy-2-phenyl-2,3-dihydrochromen-4-one                                                                                                                                                                                                                 | <chem>COC1=C(C2=C(C=C1O)OC(C2=O)C3=CC=CC=C3)O</chem>                                                                            |

**Table S2.** Free binding energies of ligand-protein complexes ( $\Delta G$ , kcal/mol)

| #  | ACE2  | SARS-CoV | SARS-CoV-2 |       |       |       |       |         |        |       |         |
|----|-------|----------|------------|-------|-------|-------|-------|---------|--------|-------|---------|
|    |       |          | Wild       | Alpha | Beta  | Gamma | Delta | Epsilon | Lambda | Mu    | Omicron |
| 1  | -24.0 | -70.8    | -49.1      | -43.3 | -26.1 | -20.4 | -35.6 | -35.9   | -34.2  | -33.4 | -32.57  |
| 2  | -26.0 | -36.7    | -44.4      | -43.0 | -37.4 | -24.4 | -34.0 | -36.7   | -32.9  | -36.1 | -10.89  |
| 3  | -27.4 | -37.0    | -48.8      | -43.5 | -37.5 | -28.1 | -41.3 | -31.9   | -29.6  | -38.3 | -46.78  |
| 4  | -18.6 | -33.4    | -42.7      | -40.9 | -29.4 | -43.5 | -28.6 | -25.0   | -27.9  | -32.7 | -27.11  |
| 5  | -19.9 | -27.3    | -48.3      | -39.2 | -29.7 | -39.3 | -32.7 | -27.8   | -21.0  | -24.4 | -34.11  |
| 6  | -32.9 | -49.3    | -68.2      | -53.7 | -39.2 | -29.2 | -47.9 | -43.3   | -47.2  | -52.0 | -46.26  |
| 7  | -46.8 | -49.0    | -43.0      | -50.2 | -39.3 | -42.3 | -37.5 | -38.3   | -32.9  | -32.2 | -41.42  |
| 8  | -24.8 | -25.9    | -30.3      | -20.6 | -31.7 | -22.9 | -30.7 | -35.4   | -25.1  | -30.4 | -34.52  |
| 9  | -28.3 | -37.8    | -50.4      | -45.1 | -38.1 | -39.4 | -45.3 | -48.6   | -35.9  | -44.4 | -51.64  |
| 10 | N/A   | -37.3    | -34.7      | N/A   | -40.5 | -50.3 | -40.3 | -37.9   | -22.3  | -31.7 | -48.34  |
| 11 | -22.1 | -51.5    | -55.2      | -18.1 | -46.8 | -28.2 | -32.5 | -39.4   | -37.2  | -35.9 | -26.44  |
| 12 | -26.2 | -31.5    | -39.6      | -46.8 | -34.4 | -26.1 | -38.8 | -38.6   | -34.5  | -42.8 | -49.66  |
| 13 | -25.8 | -49.4    | -53.6      | -26.0 | -38.8 | -32.6 | -45.2 | -43.5   | -26.1  | -41.7 | -47.84  |
| 14 | N/A   | -42.4    | -44.1      | -16.7 | -40.0 | N/A   | -46.7 | N/A     | -27.7  | N/A   | -46.35  |
| 15 | -36.8 | -75.8    | -46.7      | -27.8 | -44.2 | -77.7 | -39.1 | -40.6   | -32.6  | -36.4 | -25.34  |
| 16 | -24.5 | -38.3    | -45.9      | -50.7 | -39.4 | -33.0 | -32.8 | -48.3   | -31.0  | -42.9 | -46.28  |
| 17 | N/A   | N/A      | -35.1      | -31.4 | -31.3 | -10.5 | -16.3 | -34.0   | -25.0  | -26.9 | -25.48  |
| 18 | -16.7 | -40.1    | -55.5      | -9.4  | -27.6 | -25.5 | -36.4 | -38.4   | -29.0  | -33.0 | -26.73  |
| 19 | -30.2 | -37.6    | -47.3      | -26.6 | -40.7 | -27.6 | -18.2 | -37.3   | -27.3  | -31.8 | -34.52  |
| 20 | -29.3 | -67.3    | -51.5      | -38.4 | -38.3 | -34.5 | -20.1 | -37.0   | -31.3  | -39.5 | -29.64  |
| 21 | -30.8 | -38.8    | -35.5      | -28.7 | -36.3 | -40.6 | -37.8 | -23.2   | -29.8  | -36.1 | -35.44  |
| 22 | -25.5 | -45.4    | -41.5      | -42.9 | -42.3 | -27.9 | -28.2 | -44.0   | -27.1  | -40.0 | -39.65  |
| 23 | -30.8 | -43.1    | -48.4      | -43.1 | -34.9 | -32.4 | -33.7 | -29.9   | -24.8  | -37.4 | -37.68  |
| 24 | -20.8 | -36.1    | -43.8      | -24.2 | -34.3 | -28.5 | -45.0 | -33.1   | -23.5  | -44.3 | -38.53  |
| 25 | -41.8 | -49.2    | -62.7      | -42.0 | -50.8 | -29.4 | -37.9 | -51.3   | -48.7  | -43.1 | -36.18  |
| 26 | -24.3 | -30.0    | -34.6      | -3.9  | -29.3 | -48.9 | -37.6 | -31.5   | -19.7  | -43.1 | -35.12  |
| 27 | -31.7 | -41.4    | -48.9      | -21.0 | -37.7 | -27.4 | -27.1 | -32.3   | -30.6  | -36.6 | -40.26  |
| 28 | -37.4 | -58.1    | -63.9      | -50.1 | -73.7 | -30.8 | -39.1 | -61.4   | -50.4  | -65.2 | -69.29  |
| 29 | -29.0 | -46.1    | -74.4      | -29.7 | -44.1 | -29.3 | -49.3 | -43.5   | -41.5  | -44.2 | -50.31  |
| 30 | -24.1 | -47.8    | -51.7      | -41.8 | -31.2 | -34.4 | -38.0 | -33.8   | -34.1  | -42.5 | -46.87  |
| 31 | -19.5 | -40.6    | -42.6      | -29.2 | -35.5 | -20.0 | -22.4 | -22.5   | -27.5  | -35.2 | -23.55  |
| 32 | -22.2 | -41.6    | -50.4      | -26.3 | -20.1 | -19.4 | -23.8 | -32.1   | -28.4  | -40.1 | -34.39  |
| 33 | -23.7 | -48.4    | -61.4      | -34.4 | -44.7 | -78.4 | -40.9 | -44.8   | -29.6  | -50.0 | -46.93  |
| 34 | -23.6 | -37.8    | -42.9      | -13.1 | -41.2 | -9.7  | -22.9 | -27.4   | -24.1  | -34.5 | -41.84  |
| 35 | -26.7 | -37.1    | -40.0      | -30.5 | -38.6 | -26.4 | -24.1 | -45.7   | -32.5  | -26.0 | -29.02  |
| 36 | -4.5  | -32.2    | -34.0      | -1.0  | -31.9 | -20.6 | -24.5 | -55.9   | -22.7  | -33.2 | -46.49  |
| 37 | -19.4 | -28.3    | -48.6      | -26.9 | -29.3 | -30.2 | -28.5 | -28.9   | -29.8  | -33.6 | -24.69  |
| 38 | -44.8 | -42.7    | -68.9      | -72.1 | -51.4 | -84.3 | -62.0 | -67.7   | -40.7  | -51.8 | -60.67  |
| 39 | -42.6 | -58.3    | -67.4      | -60.8 | -76.0 | -45.6 | -40.9 | -65.1   | -49.7  | -63.2 | -65.7   |

|    |       |       |       |       |       |       |       |       |       |       |        |
|----|-------|-------|-------|-------|-------|-------|-------|-------|-------|-------|--------|
| 40 | -27.4 | -73.0 | -48.9 | -34.4 | -38.4 | -39.0 | -58.4 | -36.4 | -50.6 | -41.6 | -40.86 |
| 41 | -29.7 | -40.5 | -44.1 | -33.5 | -44.2 | -17.2 | -38.1 | -41.6 | -31.7 | -35.8 | -35.19 |
| 42 | -26.5 | -48.6 | -44.8 | -41.5 | -36.4 | -24.6 | -33.0 | -31.4 | -27.3 | -31.7 | -46.42 |
| 43 | -35.7 | -33.4 | -35.5 | -20.7 | -25.2 | -41.5 | -41.5 | -34.0 | -28.7 | -33.9 | -22.14 |
| 44 | -15.6 | N/A   | -47.1 | -41.3 | -38.4 | -39.5 | -35.0 | -45.9 | -21.7 | -40.7 | -39.14 |
| 45 | -27.6 | -42.0 | -46.5 | -35.4 | -35.6 | -22.9 | -32.4 | -36.7 | -27.9 | -35.9 | -39.93 |
| 46 | -11.9 | -53.4 | -51.8 | -38.9 | -31.8 | -41.7 | -46.9 | -36.8 | N/A   | -47.7 | -42.56 |
| 47 | -47.2 | -46.3 | -39.0 | -35.9 | -36.9 | -23.6 | -45.1 | -38.7 | -26.3 | -42.7 | -38.83 |
| 48 | -31.0 | -36.1 | -40.5 | -32.4 | -36.9 | -26.1 | -38.4 | -38.4 | -26.0 | -35.9 | -44.82 |
